# Supplementary material for: Residential greenness and mortality in oldest-old women and men in China: a longitudinal cohort study
Source: PubMed Central journal article supplement (PMC6358124; doi:10.1016/s2542-5196(18)30264-x), 2019-01
Supplement: mmc1.pdf [file mmc1.pdf]

# THE LANCET

## Planetary Health

### Supplementary appendix

This appendix formed part of the original submission and has been peer reviewed. We post it as supplied by the authors.

Supplement to: Ji JS, Zhu A, Bai C and others. Residential greenness and mortality in oldest-old women and men in China: a longitudinal cohort study. *Lancet Planet Health* 2019; **3**: e17–25.

**Supplementary Table 1: Associated factors of survival status for CLHLS subjects: 2000-2014 (n=23 754, with 18 948 deaths)**

| <b>Predictors</b>                                     | <b>HR (95%CI)</b> | <b>p value</b> |
|-------------------------------------------------------|-------------------|----------------|
| 0.1*NDVI                                              | 0.95 (0.94, 0.95) | <0.001         |
| Age                                                   | 1.06 (1.05, 1.06) | <0.001         |
| Female (Ref: males)                                   | 0.73 (0.71, 0.76) | <0.001         |
| Han Chinese (Ref: others)                             | 1.08 (1.01, 1.15) | 0.021          |
| Married and living with spouses<br>(Ref: not married) | 0.84 (0.80, 0.88) | <0.001         |
| Childhood SES                                         | 1.01 (1.00, 1.03) | 0.104          |
| Adult SES                                             | 0.98 (0.96, 0.99) | 0.012          |
| Social and leisure activity                           | 0.85 (0.84, 0.86) | <0.001         |
| Smoking status (Ref: not smoke)                       | 1.03 (0.99, 1.08) | 0.177          |
| Drinking status (Ref: not drink)                      | 0.98 (0.94, 1.02) | 0.299          |
| Physical activity (Ref: not exercise)                 | 0.90 (0.86, 0.93) | <0.001         |
| Geographic region (Ref: Northeastern China)           |                   |                |
| Central China                                         | 1.05 (0.98, 1.12) | 0.193          |
| Eastern China                                         | 1.02 (0.96, 1.09) | 0.444          |
| Northern China                                        | 1.06 (0.97, 1.16) | 0.174          |
| Northwestern China                                    | 1.05 (0.91, 1.21) | 0.530          |
| Southern China                                        | 0.97 (0.90, 1.03) | 0.334          |
| Southwestern China                                    | 1.01 (0.95, 1.09) | 0.712          |

**Supplementary Table 2: Hazard Ratios and 95% confidence intervals for contemporaneous NDVI (250m buffer) and cause-specific mortality\*\* in the CLHLS: 2000-2014 (n=23 754, with 18 948 deaths)**

| Health outcomes                                               | Greenness quartile 1 | Greenness quartile 2 | Greenness quartile 3 | Greenness quartile 4 | p for trend |
|---------------------------------------------------------------|----------------------|----------------------|----------------------|----------------------|-------------|
| Cancer (n=240)                                                |                      |                      |                      |                      |             |
| Cases                                                         | 73                   | 72                   | 51                   | 44                   |             |
| Fully-adjusted HR (95% CI)                                    | Reference            | 0.67 (0.46, 0.97)    | 0.70 (0.46, 1.04)    | 1.16 (0.76, 1.75)    | 0.555       |
| Cardiovascular disease (n=1076)                               |                      |                      |                      |                      |             |
| Cases                                                         | 358                  | 257                  | 244                  | 217                  |             |
| Fully-adjusted HR (95% CI)                                    | Reference            | 1.01 (0.85, 1.20)    | 1.08 (0.91, 1.30)    | 1.04 (0.86, 1.25)    | 0.538       |
| Respiratory diseases (n=678)                                  |                      |                      |                      |                      |             |
| Cases                                                         | 188                  | 159                  | 187                  | 144                  |             |
| Fully-adjusted HR (95% CI)                                    | Reference            | 1.02 (0.81, 1.27)    | 0.94 (0.75, 1.17)    | 1.05 (0.83, 1.33)    | 0.878       |
| Injuries and poisoning (n=74)                                 |                      |                      |                      |                      |             |
| Cases                                                         | 21                   | 24                   | 16                   | 13                   |             |
| Fully adjusted HR (95% CI)                                    | Reference            | 0.41 (0.18, 0.92)    | 0.48 (0.20, 1.12)    | 0.92 (0.38, 2.24)    | 0.997       |
| Endocrine, nutritional, metabolic and immune diseases (n=265) |                      |                      |                      |                      |             |
| Cases                                                         | 63                   | 74                   | 71                   | 57                   |             |
| Fully adjusted HR (95% CI)                                    | Reference            | 0.93 (0.64, 1.37)    | 0.88 (0.61, 1.27)    | 0.89 (0.60, 1.32)    | 0.517       |
| Urinary and reproductive diseases (n=62)                      |                      |                      |                      |                      |             |
| Cases                                                         | 15                   | 14                   | 15                   | 18                   |             |
| Fully adjusted HR (95% CI)                                    | Reference            | 0.63 (0.24, 1.69)    | 1.22 (0.42, 3.52)    | 1.23 (0.52, 2.92)    | 0.497       |
| Infectious diseases (n=55)                                    |                      |                      |                      |                      |             |
| Cases                                                         | 9                    | 15                   | 15                   | 16                   |             |
| Fully adjusted HR (95% CI)                                    | Reference            | 1.01 (0.28, 3.67)    | 1.28 (0.38, 4.38)    | 1.20 (0.37, 3.92)    | 0.616       |

\*Note: There are few deaths caused by dementia (n=13) and neurosis (n=13). The sample size is not big enough for the Cox proportional hazard models.

\*\* Cause-specific mortality in the CLHLS was higher underestimated, underreported, and only available before 2005 wave. Therefore, the sum of specific causes of death in this table is fewer than total number of death.
